# Supplementary material
Source: PubMed Central journal article supplement (PMC2993363)
Supplement: 1000780107_pnas.201000780SI.pdf [file 1000780107_pnas.201000780SI.pdf]

# Supporting Information

Galford et al. 10.1073/pnas.1000780107

## SI Text

**Land-Cover and Land-Use Change.** By 2006, one-third of Mato Grosso was already in pasture or cropland (Table S1), with croplands accounting for 29% of all agricultural land. Of the remaining area, there was 378,735 km<sup>2</sup> of intact forest and 231,487 km<sup>2</sup> of cerrado (Table S1). The two BAU scenarios project that 49% of Mato Grosso will be converted to agriculture by 2050 (Fig. S1); one-third of the forest area will be lost by 2050, and cerrado will be reduced by 7%. In the BAUCrop scenario, cropland areas will account for >50% of all agricultural land, an increase of 162% over the study period. Pastures will cover 80% of all agricultural land by 2050 in the BAUPasture scenario, increasing by 140,813 km<sup>2</sup> over the study period. For the GOV scenarios, there will be 10% loss of forest areas and a 3% loss from cerrado by 2050. Agriculture will cover 37% of the state by 2050 in the GOV scenarios. The increases in cropland areas will be more modest in the GOVCrop scenario (46%), compared with the BAUCrop scenario, and will account for 37% of all agricultural land. Pasture areas in the GOVPasture scenario will increase 8%.

**TEM Datasets.** To develop regional estimates of carbon and nitrogen stocks and fluxes, the TEM needs spatially explicit data for elevation, soil texture, land cover, climate, and atmospheric chemistry variables at a spatial resolution of 1 km × 1 km. The elevation and soil texture are from Galford et al. (1). For climate, we used spatially explicit data sets recently developed by Melillo et al. (2) to represent future global climate as influenced by a policy to control greenhouse gas emissions from industrial and fossil fuel sources with an atmospheric stabilization of 550 ppmv CO<sub>2</sub> concentration by 2100. Atmospheric CO<sub>2</sub> concentrations are global annual averages and reach 473 ppmv by 2050 (Fig. S24). The monthly mean air temperature and precipitation data were downscaled from a 0.5° latitude × 0.5° longitude spatial resolution to 1 km<sup>2</sup> such that all 1-km grid cells contained within a much larger 0.5° grid cell simply used the value of

a climate driver from the larger grid cell. Because sharp climate gradients generally do not occur in the state of Mato Grosso, we believed this to be an adequate approach. For ozone, the AOT40 index increased around 2025 and then decreased to just above 2000 levels by 2050 (Fig. S2B). The average annual air temperature increased 0.2 degrees every decade (Fig. S2D). Regional precipitation showed no strong trend over the study period but high interannual variability (Fig. S2D).

**Uncertainty in Estimating Greenhouse Gas Emissions.** The extent of deforestation is the primary source of uncertainty in our estimates of future greenhouse gas emissions (*Background and Methods*). Assumptions about biomass can have a large impacts on the carbon emissions from deforestation (1). For contemporary conditions, TEM is well calibrated for Amazon undisturbed forest ecosystems across the Amazon (3). In Mato Grosso, our model estimates a forest biomass of 217 ± 75 Mg C ha<sup>-1</sup> (1), which reflects primarily the rainfall gradient. This biomass estimate is within recent reported biomass ranges 130–442 Mg ha<sup>-1</sup> (4), 130–220 Mg ha<sup>-1</sup> (5), and 169 Mg ha<sup>-1</sup> (6), which are also indicative of the regional rainfall gradient. We may overestimate carbon loss at the time of clearing in areas where selective logging occurred, which typically happens within a few years before deforestation (7, 8) or in areas that are subjected to wild fires induced by logging or climate-related changes in temperature and humidity (9). Constraints on uncertainty for N<sub>2</sub>O emissions are discussed in *Background and Methods*.

The impact of increasing cattle stocking rates linearly impacts methane emissions, but not other greenhouse gas emissions, in our greenhouse gas budget. In the case of the high stocking rates, 7 animal units per hectare, methane emissions would increase 7-fold (ranging by scenario from 2.4 to 3.7 Pg CO<sub>2</sub>-e cumulative emissions from 2006 to 2050). As described in *Background and Methods* and in Galford et al. (1), cycling of carbon and nitrogen in pastures is based on assumptions of constant turnover rates that are not affected by the cattle stocking rates.

1. Galford GL (2009) Biogeochemical consequences of land-cover and land-use changes in the agricultural frontier of the Brazilian Amazon. PhD thesis (Brown Univ, Providence, RI).
2. Melillo JM, et al. (2009) Indirect emissions from biofuels: How important? *Science* 326: 1397–1399.
3. Tian H, et al. (1998) Effect of interannual climate variability on carbon storage in Amazonian ecosystems. *Nature* 396:664–667.
4. Saatchi SS, et al. (2007) Distribution of aboveground live biomass in the Amazon basin. *Glob Change Biol* 13:816–837.
5. Houghton RA, et al. (2001) The spatial distribution of forest biomass in the Brazilian Amazon: A comparison of estimates. *Glob Change Biol* 7:731–746.
6. Fearnside PM, et al. (2009) Biomass and greenhouse-gas emissions from land-use change in Brazil's Amazonian "arc of deforestation": The states of Mato Grosso and Rondônia. *For Ecol Manage* 258:1968–1978.
7. Asner GP, et al. (2006) Condition and fate of logged forests in the Brazilian Amazon. *Proc Natl Acad Sci USA* 103:12947–12950.
8. Asner GP, et al. (2005) Selective logging in the Brazilian Amazon. *Science* 310:480–482.
9. Nepstad DC, Stickler CM, Filho BS, Merry F (2008) Interactions among Amazon land use, forests and climate: prospects for a near-term forest tipping point. *Philos Trans R Soc Lond B Biol Sci* 363:1737–1746.



**Table S1. Potential vegetation types (1), their original extent before land use, and extent of natural vegetation and land use by 2050 in each scenario (km<sup>2</sup>)**

| Land cover/land use             | Natural extent | CONST   | BAUCrop | BAUPasture | GOVCrop | GOVPasture |
|---------------------------------|----------------|---------|---------|------------|---------|------------|
| Tropical evergreen forests      | 137,670        | 123,936 | 65,845  | 65,845     | 112,012 | 112,012    |
| Tropical deciduous forests      | 371,876        | 229,054 | 163,417 | 163,417    | 206,513 | 206,513    |
| Riparian forests                | 38,602         | 25,745  | 21,175  | 21,175     | 24,658  | 24,658     |
| Cerrado stricto sensu (savanna) | 264,572        | 166,854 | 157,012 | 157,012    | 163,266 | 163,266    |
| Cerradão (dense savanna)        | 41,191         | 18,753  | 16,611  | 16,611     | 18,104  | 18,104     |
| Campo limpo (savanna grassland) | 65,738         | 45,880  | 41,900  | 41,900     | 45,017  | 45,017     |
| Single cropping                 | —              | 54,159  | 47,560  | 523        | 50,289  | 523        |
| Double cropping                 | —              | 35,374  | 186,947 | 89,010     | 80,091  | 89,010     |
| Pasture                         | —              | 221,092 | 221,092 | 366,066    | 221,092 | 261,939    |
| Other (water, unclassified)     | 5,576          | 4,378   | 3,666   | 3,666      | 4,183   | 4,183      |

1. Mello F (2007) Estimates of soil carbon stocks in the states of Rondônia e Mato Grosso before human interventions (Portuguese). MS thesis (Escola Superior de Agricultura "Luiz de Queiroz," Universidade de São Paulo, Piracicaba, Brazil).
